# Supplementary material for: Re-examination of species limits in Aspergillus section Flavipedes using advanced species delimitation methods and description of four new species
Source: PubMed Central journal article supplement — Stud Mycol. 2021 Dec 16;99:100120. doi: 10.1016/j.simyco.2021.100120 (PMC8688885; doi:10.1016/j.simyco.2021.100120), 2021-12-16
Supplement: mmc1.pdf [file mmc1.pdf]

## SUPPLEMENTARY INFORMATION

### Re-examination of species limits in *Aspergillus* section *Flavipedes* using advanced species delimitation methods and description of four new species

F. Sklenář<sup>1,2</sup>, Ž. Jurjević<sup>3</sup>, J. Houbraken<sup>4</sup>, M. Kolařík<sup>1,2</sup>, M.C. Arendrup<sup>5,6,7</sup>, K.M. Jørgensen<sup>5</sup>, J.P.Z. Siqueira<sup>8,9</sup>, J. Gené<sup>9</sup>, T. Yaguchi<sup>10</sup>, C.N. Ezekiel<sup>11</sup>, C.S. Pereira<sup>12,13</sup>, V. Hubka<sup>1,2,10\*</sup>

<sup>1</sup>*Department of Botany, Faculty of Science, Charles University, Prague, Czech Republic.*

<sup>2</sup>*Laboratory of Fungal Genetics of the Czech Academy of Sciences, Prague, Czech*

*Republic.* <sup>3</sup>*EMSL Analytical, Cinnaminson, New Jersey, USA.* <sup>4</sup>*Westerdijk Fungal*

*Biodiversity Institute, Utrecht, The Netherlands.* <sup>5</sup>*Unit of Mycology, Statens Serum Institut,*

*Copenhagen, Denmark.* <sup>6</sup>*Department of Clinical Microbiology, Rigshospitalet, Copenhagen,*

*Denmark.* <sup>7</sup>*Department of Clinical Medicine, University of Copenhagen, Copenhagen,*

*Denmark.* <sup>8</sup>*Laboratório de Microbiologia, Faculdade de Medicina de São José do Rio Preto,*

*São José do Rio Preto, Brazil.* <sup>9</sup>*Unitat de Micologia, Facultat de Medicina i Ciències de la*

*Salut, IISPV, Universitat Rovira i Virgili, Reus, Spain.* <sup>10</sup>*Medical Mycology Research Center,*

*Chiba University, Chuo-ku, Chiba, Japan.* <sup>11</sup>*Department of Microbiology, Babcock University,*

*Ilishan Remo, Ogun State, Nigeria.* <sup>12</sup>*Instituto de Tecnologia Química e Biológica (ITQB-*

*UNL), Oeiras, Portugal.* <sup>13</sup>*Instituto de Biologia Experimental e Tecnológica (IBET), Oeiras,*

*Portugal.*

\*Correspondence: V. Hubka, [vit.hubka@gmail.com](mailto:vit.hubka@gmail.com)

## LIST OF CONTENT

**Supplementary Fig. S1.** The results of species delimitation by STACEY in the series *Flavipedes* with the chosen *collapseheight* parameter = 0.005 (A) and 0.0001 (B). The similarity matrices give the posterior probability of every two isolates belonging to the same multi-species coalescent cluster (tentative species). The darkest brown shade corresponds to a posterior probability of 1, while a white colour is equal to 0. The horizontal and vertical lines in the similarity matrices depicts the species boundaries proposed by the analysis. Ex-type isolates are highlighted with bold font. Presented phylogenetic trees were calculated in STACEY.

**Supplementary Fig. S2.** The results of species delimitation by STACEY in the series *Spelaei* with the chosen *collapseheight* parameter = 0.002 (A) and 0.00075 (B). The similarity matrices give the posterior probability of every two isolates belonging to the same multi-species coalescent cluster (tentative species). The darkest brown shade corresponds to a posterior probability of 1, while a white colour is equal to 0. The horizontal and vertical lines in the similarity matrices depicts the species boundaries proposed by the analysis. Ex-type isolates are highlighted with bold font. Presented phylogenetic trees were calculated in STACEY.

**Supplementary Table S1.** Delimitation of isolates into populations by BPP 4.3 with 0.9 posterior probability cutoff.

**Supplementary Table S2.** Minimum inhibitory concentrations determined with EUCAST E.Def.9.3 method at 37 °C for members of *Aspergillus* sect. *Flavipedes*.

# Supplementary Figure S1

**A** collapseheight = 0.005

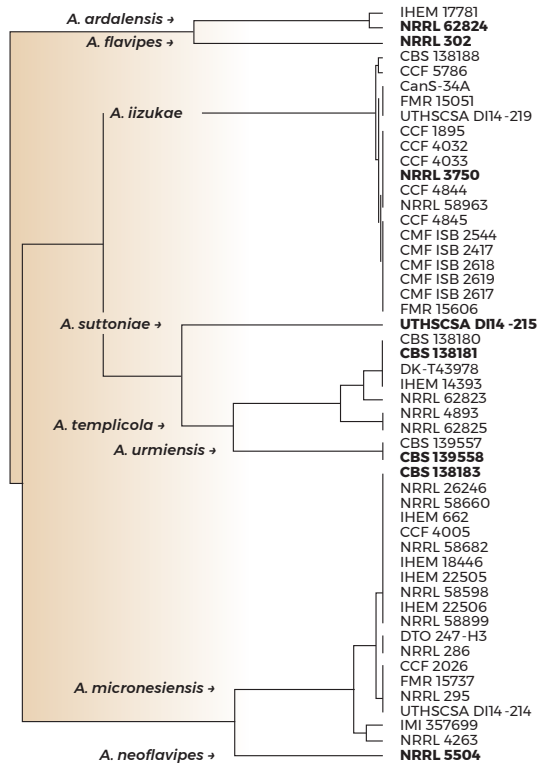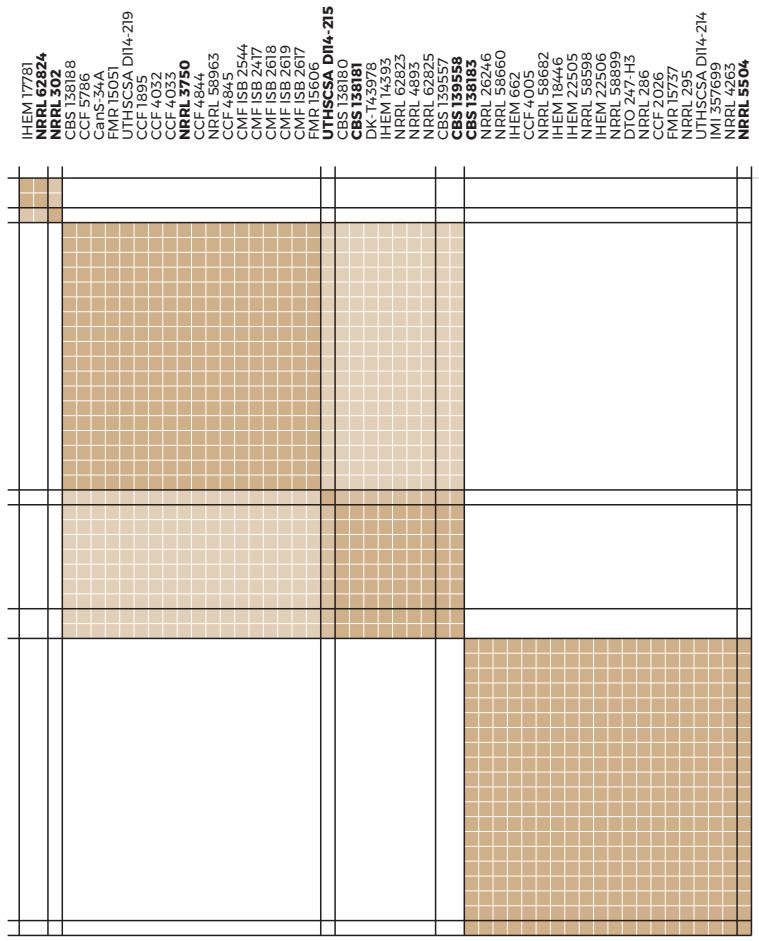

**B** collapseheight = 0.0001

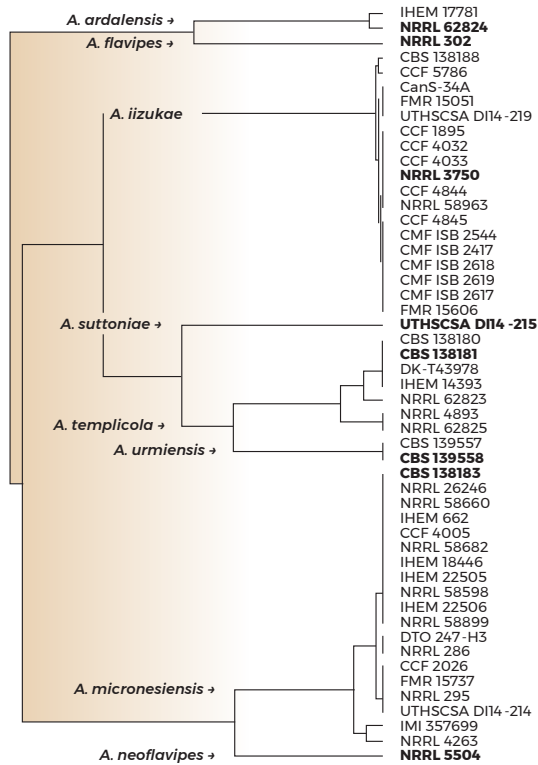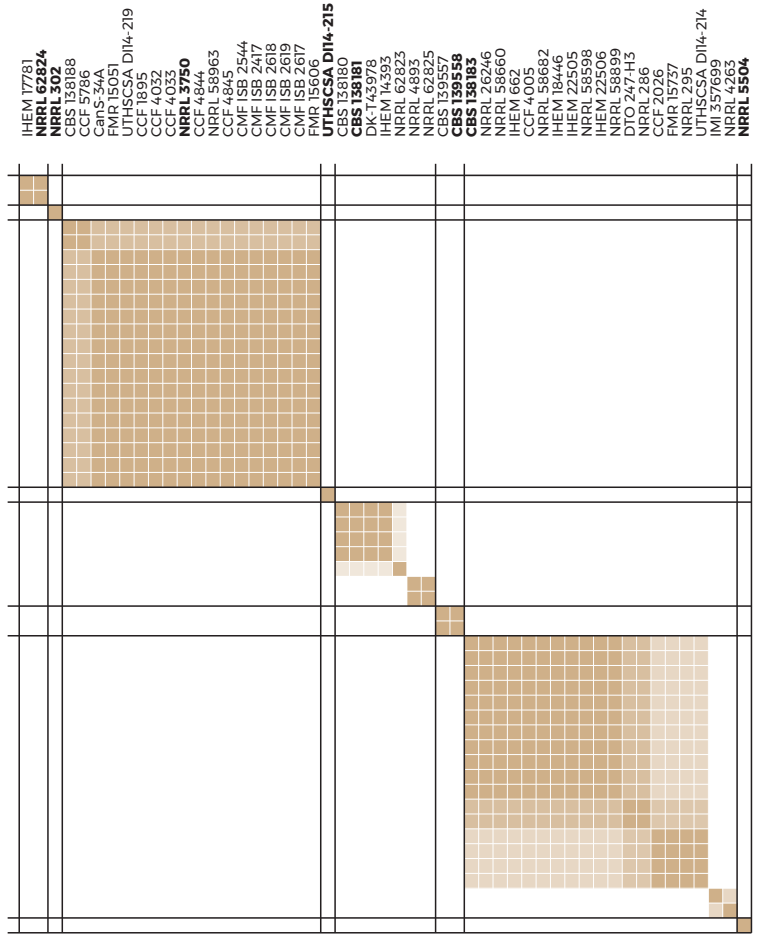

# Supplementary Figure S2

**A** collapseheight = 0.002

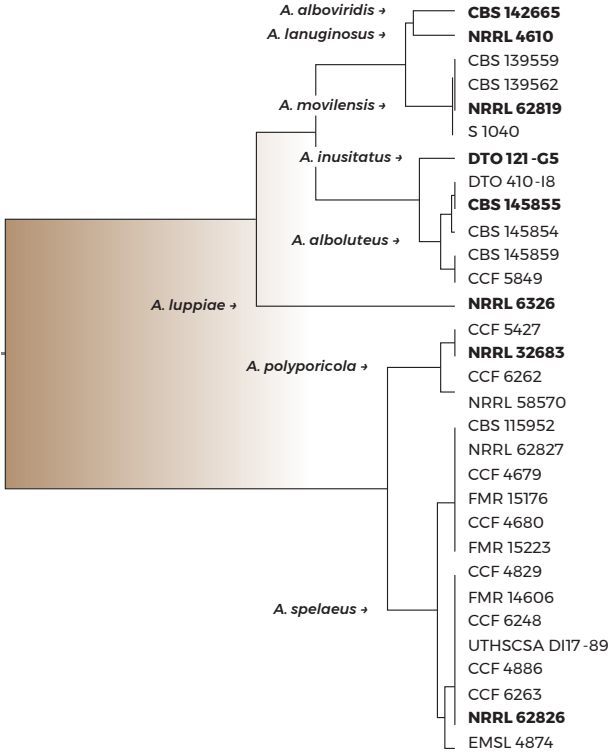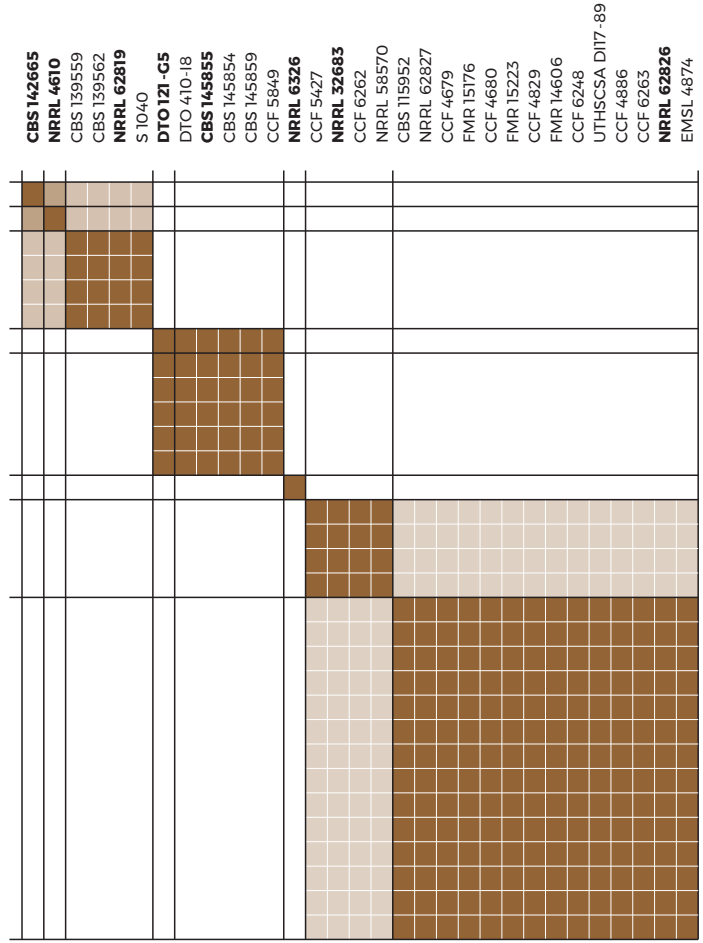

**B** collapseheight = 0.00075

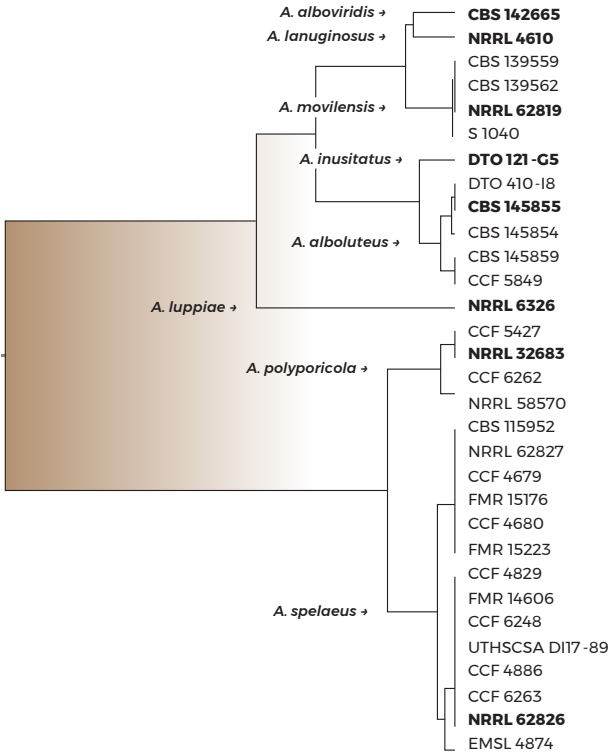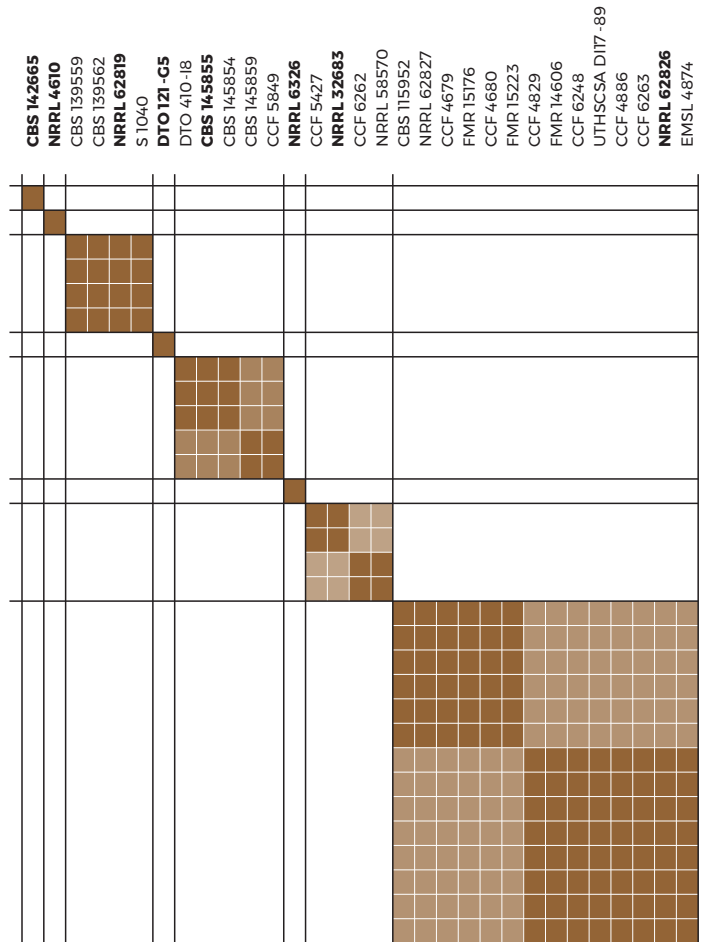

**Table S1.** Delimitation of isolates into populations by BPP 4.3 with 0.9 posterior probability cutoff

|                                        |                                                                                |
|----------------------------------------|--------------------------------------------------------------------------------|
| <i>A. alboluteus</i> population 1      | CCF 5849, CBS 145859                                                           |
| <i>A. alboluteus</i> population 2      | CBS 145854                                                                     |
| <i>A. alboluteus</i> population 3      | CBS 145855                                                                     |
| <i>A. alboluteus</i> population 4      | DTO 410-18                                                                     |
| <i>A. alboviridis</i> population 1     | CBS 142665                                                                     |
| <i>A. ardalensis</i> population 1      | IHEM 17781                                                                     |
| <i>A. ardalensis</i> population 2      | NRRL 62824                                                                     |
| " <i>A. capensis</i> " population 1    | CBS 138188                                                                     |
| " <i>A. capensis</i> " population 2    | CanS 34A                                                                       |
| <i>A. flavipes</i> population 1        | NRRL 302, NRRL 4852                                                            |
| <i>A. iizukae</i> population 1         | CCF 5786                                                                       |
| <i>A. iizukae</i> population 2         | CCF 1895                                                                       |
| <i>A. iizukae</i> population 3         | CMF ISB 2617, FMR 15606                                                        |
| <i>A. iizukae</i> population 4         | CCF 4845, CMF ISB 2544, CMF ISB 2417, CMF ISB 2616, CMF ISB 2618, CMF ISB 2620 |
| <i>A. iizukae</i> population 5         | CMF ISB 2619                                                                   |
| <i>A. iizukae</i> population 6         | NRRL 3750, CCF 4032, CCF 4033                                                  |
| <i>A. iizukae</i> population 7         | CCF 4844, NRRL 58963                                                           |
| <i>A. iizukae</i> population 8         | FMR 15051                                                                      |
| <i>A. iizukae</i> population 9         | UTHSCSA DI14-219                                                               |
| <i>A. inusitatus</i> population 1      | DTO 121-G5                                                                     |
| <i>A. lanuginosus</i> population 1     | NRRL 4610                                                                      |
| <i>A. luppiae</i> population 1         | NRRL 6326                                                                      |
| <i>A. micronesiensis</i> population 1  | DTO 247-H3, NRRL 286                                                           |
| <i>A. micronesiensis</i> population 2  | NRRL 58660, CBS 138183, NRRL 26246, IHEM 662, NRRL 4578                        |
| <i>A. micronesiensis</i> population 3  | IHEM 18446, NRRL 58682, CCF 4005                                               |
| <i>A. micronesiensis</i> population 4  | NRRL 58598, IHEM 22505, IHEM 22506, NRRL 58899                                 |
| <i>A. micronesiensis</i> population 5  | FMR 15737                                                                      |
| <i>A. micronesiensis</i> population 6  | NRRL 295                                                                       |
| <i>A. micronesiensis</i> population 7  | CCF 2026                                                                       |
| <i>A. micronesiensis</i> population 8  | UTHSCSA DI14-214                                                               |
| <i>A. micronesiensis</i> population 9  | IMI 357699                                                                     |
| <i>A. micronesiensis</i> population 10 | NRRL 4263                                                                      |
| <i>A. movilensis</i> population 1      | CBS 139562, NRRL 62819, CBS 139559                                             |
| <i>A. movilensis</i> population 2      | S1040                                                                          |
| <i>A. neoflavipes</i> population 1     | NRRL 5504                                                                      |
| <i>A. olivimuriae</i> population 1     | NRRL 66783                                                                     |
| <i>A. polyporicola</i> population 1    | NRRL 32683, CCF 5427                                                           |
| <i>A. polyporicola</i> population 2    | CCF 6262                                                                       |
| <i>A. polyporicola</i> population 3    | NRRL 58570                                                                     |
| <i>A. spelaeus</i> population 1        | NRRL 62827, FMR 15176, CBS 115952, CCF 4679, CCF 4697                          |
| <i>A. spelaeus</i> population 2        | CCF 4680, FMR 15223                                                            |
| <i>A. spelaeus</i> population 3        | EMSL 4874                                                                      |
| <i>A. spelaeus</i> population 4        | FMR 14606, CCF 4829                                                            |
| <i>A. spelaeus</i> population 5        | UTHSCSA_DI17-89, CCF 6248                                                      |
| <i>A. spelaeus</i> population 6        | CCF 4886, CCF 6263                                                             |
| <i>A. spelaeus</i> population 7        | NRRL 62826, CCF 4699                                                           |
| <i>A. suttoniae</i> population 1       | UTHSCSA_DI14-215                                                               |
| <i>A. templicola</i> population 1      | NRRL 62825, NRRL 4893                                                          |
| <i>A. templicola</i> population 2      | NRRL 62823                                                                     |
| <i>A. templicola</i> population 3      | DK T43978                                                                      |
| <i>A. templicola</i> population 4      | CBS 138180, CBS 138181                                                         |
| <i>A. templicola</i> population 5      | IHEM 14393                                                                     |
| <i>A. urmiensis</i> population 1       | CBS 139557, CBS 139558, CBS 139766                                             |

**Table S2.** Minimum inhibitory concentrations determined with EUCAST E.Def.9.3 method at 37 °C<sup>1</sup> for members of *Aspergillus* sect. *Flavipedes*

| <b>Amphotericin B</b>    | <b>0.06</b> | <b>0.125</b> | <b>0.25</b> | <b>0.5</b> | <b>1</b>  | <b>2</b> | <b>≥ 4</b> | <b>In total</b> |
|--------------------------|-------------|--------------|-------------|------------|-----------|----------|------------|-----------------|
| <i>A. alboluteus</i>     |             | 1            | 1           | 1          | 2         |          |            | 5               |
| <i>A. albobiridis</i>    |             |              |             | 1          |           |          |            | 1               |
| <i>A. ardalensis</i>     |             |              |             |            | 1         | 1        |            | 2               |
| <i>A. flavipes</i>       |             |              |             | 1          |           | 1        |            | 2               |
| <i>A. iizukae</i>        |             |              | 1           | 4          | 4         | 1        |            | 10              |
| <i>A. inusitatus</i>     |             |              |             |            | 1         |          |            | 1               |
| <i>A. lanuginosus</i>    |             | 1            |             |            |           |          |            | 1               |
| <i>A. luppieae</i>       | 1           |              |             |            |           |          |            | 1               |
| <i>A. micronesiensis</i> |             | 1            |             | 9          | 6         |          |            | 16              |
| <i>A. movilensis</i>     |             | 2            | 2           |            |           |          |            | 4               |
| <i>A. neoflavipes</i>    |             |              |             | 1          |           |          |            | 1               |
| <i>A. olivimuriae</i>    |             |              |             | 1          |           |          |            | 1               |
| <i>A. polyporicola</i>   |             |              | 1           | 1          | 2         |          |            | 4               |
| <i>A. spelaeus</i>       |             |              |             | 5          | 2         | 2        |            | 9               |
| <i>A. suttoniae</i>      |             |              |             | 1          |           |          |            | 1               |
| <i>A. templicola</i>     |             | 1            | 1           | 3          | 1         |          |            | 6               |
| <i>A. urmiensis</i>      |             |              |             |            |           |          | 1          | 1               |
| <b>In total</b>          | <b>1</b>    | <b>6</b>     | <b>6</b>    | <b>28</b>  | <b>19</b> | <b>6</b> | <b>1</b>   | <b>67</b>       |

| <b>Itraconazole</b>      | <b>0.03</b> | <b>0.06</b> | <b>0.125</b> | <b>0.25</b> | <b>0.5</b> | <b>1</b> | <b>In total</b> |
|--------------------------|-------------|-------------|--------------|-------------|------------|----------|-----------------|
| <i>A. alboluteus</i>     |             |             | 5            |             |            |          | 5               |
| <i>A. albobiridis</i>    |             |             |              | 1           |            |          | 1               |
| <i>A. ardalensis</i>     |             |             |              |             |            | 1        | 1               |
| <i>A. flavipes</i>       |             | 1           | 1            |             |            |          | 2               |
| <i>A. iizukae</i>        | 1           |             | 5            | 4           |            |          | 10              |
| <i>A. inusitatus</i>     |             | 1           |              |             |            |          | 1               |
| <i>A. lanuginosus</i>    | 1           |             |              |             |            |          | 1               |
| <i>A. luppieae</i>       |             | 1           |              |             |            |          | 1               |
| <i>A. micronesiensis</i> |             |             | 5            | 5           | 6          |          | 16              |
| <i>A. movilensis</i>     | 2           |             | 2            |             |            |          | 4               |
| <i>A. neoflavipes</i>    |             | 1           |              |             |            |          | 1               |
| <i>A. olivimuriae</i>    |             | 1           |              |             |            |          | 1               |
| <i>A. polyporicola</i>   |             |             |              |             |            | 4        | 4               |
| <i>A. spelaeus</i>       |             |             |              | 1           | 7          | 1        | 9               |
| <i>A. suttoniae</i>      |             | 1           |              |             |            |          | 1               |
| <i>A. templicola</i>     |             | 1           | 1            | 2           | 2          |          | 6               |
| <i>A. urmiensis</i>      |             |             | 1            | 1           |            |          | 2               |
| <b>In total</b>          | <b>4</b>    | <b>7</b>    | <b>20</b>    | <b>14</b>   | <b>20</b>  | <b>2</b> | <b>67</b>       |

| <b>Voriconazole</b>      | <b>0.125</b> | <b>0.25</b> | <b>0.5</b> | <b>1</b> | <b>2</b> | <b>4</b> | <b>8</b> | <b>In total</b> |
|--------------------------|--------------|-------------|------------|----------|----------|----------|----------|-----------------|
| <i>A. alboluteus</i>     |              | 1           | 4          |          |          |          |          | 5               |
| <i>A. albobiridis</i>    |              |             |            | 1        |          |          |          | 1               |
| <i>A. ardalensis</i>     |              |             |            |          | 1        |          | 1        | 2               |
| <i>A. flavipes</i>       |              |             | 1          | 1        |          |          |          | 2               |
| <i>A. iizukae</i>        |              |             | 3          | 7        |          |          |          | 10              |
| <i>A. inusitatus</i>     |              | 1           |            |          |          |          |          | 1               |
| <i>A. lanuginosus</i>    | 1            |             |            |          |          |          |          | 1               |
| <i>A. luppieae</i>       |              | 1           |            |          |          |          |          | 1               |
| <i>A. micronesiensis</i> |              | 1           | 13         | 2        |          |          |          | 16              |
| <i>A. movilensis</i>     |              |             | 3          | 1        |          |          |          | 4               |
| <i>A. neoflavipes</i>    |              | 1           |            |          |          |          |          | 1               |
| <i>A. olivimuriae</i>    |              |             | 1          |          |          |          |          | 1               |

|                        |          |           |           |           |          |          |          |           |
|------------------------|----------|-----------|-----------|-----------|----------|----------|----------|-----------|
| <i>A. polyporicola</i> |          |           |           | 3         | 1        |          |          | 4         |
| <i>A. spelaeus</i>     |          |           |           | 4         | 5        |          |          | 9         |
| <i>A. suttoniae</i>    |          |           | 1         |           |          |          |          | 1         |
| <i>A. templicola</i>   | 1        | 5         |           |           |          |          |          | 6         |
| <i>A. urmiensis</i>    |          | 2         |           |           |          |          |          | 2         |
| <b>In total</b>        | <b>2</b> | <b>12</b> | <b>26</b> | <b>19</b> | <b>7</b> | <b>0</b> | <b>1</b> | <b>67</b> |

| <b>Terbinafine</b>       | <b>0.06</b> | <b>0.125</b> | <b>0.25</b> | <b>0.5</b> | <b>1</b> | <b>2</b> | <b>4</b> | <b>In total</b> |
|--------------------------|-------------|--------------|-------------|------------|----------|----------|----------|-----------------|
| <i>A. alboluteus</i>     |             |              | 3           | 2          |          |          |          | 5               |
| <i>A. alboviridis</i>    |             |              |             |            |          |          | 1        | 1               |
| <i>A. ardalensis</i>     |             |              | 1           |            | 1        |          |          | 2               |
| <i>A. flavipes</i>       |             | 2            |             |            |          |          |          | 2               |
| <i>A. iizukae</i>        |             |              | 9           | 1          |          |          |          | 10              |
| <i>A. inusitatus</i>     |             | 1            |             |            |          |          |          | 1               |
| <i>A. lanuginosus</i>    |             |              | 1           |            |          |          |          | 1               |
| <i>A. lupppiae</i>       |             |              | 1           |            |          |          |          | 1               |
| <i>A. micronesiensis</i> |             | 2            | 14          |            |          |          |          | 16              |
| <i>A. movilensis</i>     |             | 1            | 3           |            |          |          |          | 4               |
| <i>A. neoflavipes</i>    |             |              |             | 1          |          |          |          | 1               |
| <i>A. olivimuriae</i>    | 1           |              |             |            |          |          |          | 1               |
| <i>A. polyporicola</i>   |             |              | 2           | 2          |          |          |          | 4               |
| <i>A. spelaeus</i>       |             |              | 4           | 5          |          |          |          | 9               |
| <i>A. suttoniae</i>      |             |              | 1           |            |          |          |          | 1               |
| <i>A. templicola</i>     |             | 2            | 4           |            |          |          |          | 6               |
| <i>A. urmiensis</i>      |             |              | 2           |            |          |          |          | 2               |
| <b>In total</b>          | <b>1</b>    | <b>8</b>     | <b>45</b>   | <b>11</b>  | <b>1</b> | <b>0</b> | <b>1</b> | <b>67</b>       |

| <b>Posaconazole</b>      | <b>0.03</b> | <b>0.06</b> | <b>0.125</b> | <b>0.25</b> | <b>0.5</b> | <b>1</b> | <b>In total</b> |
|--------------------------|-------------|-------------|--------------|-------------|------------|----------|-----------------|
| <i>A. alboluteus</i>     |             |             | 2            | 3           |            |          | 5               |
| <i>A. alboviridis</i>    |             |             |              | 1           |            |          | 1               |
| <i>A. ardalensis</i>     |             |             |              | 1           |            | 1        | 2               |
| <i>A. flavipes</i>       |             |             | 1            | 1           |            |          | 2               |
| <i>A. iizukae</i>        | 1           |             |              | 8           | 1          |          | 10              |
| <i>A. inusitatus</i>     | 1           |             |              |             |            |          | 1               |
| <i>A. lanuginosus</i>    | 1           |             |              |             |            |          | 1               |
| <i>A. lupppiae</i>       |             |             | 1            |             |            |          | 1               |
| <i>A. micronesiensis</i> |             |             |              | 7           | 6          | 3        | 16              |
| <i>A. movilensis</i>     | 4           |             |              |             |            |          | 4               |
| <i>A. neoflavipes</i>    |             |             | 1            |             |            |          | 1               |
| <i>A. olivimuriae</i>    |             |             | 1            |             |            |          | 1               |
| <i>A. polyporicola</i>   |             |             |              |             | 2          | 2        | 4               |
| <i>A. spelaeus</i>       |             |             |              |             | 5          | 4        | 9               |
| <i>A. suttoniae</i>      |             |             | 1            |             |            |          | 1               |
| <i>A. templicola</i>     | 1           | 1           | 2            | 2           |            |          | 6               |
| <i>A. urmiensis</i>      |             |             |              | 1           | 1          |          | 2               |
| <b>In total</b>          | <b>8</b>    | <b>8</b>    | <b>24</b>    | <b>17</b>   | <b>9</b>   | <b>1</b> | <b>36</b>       |

| <b>Isavuconazole</b>  | <b>0.125</b> | <b>0.25</b> | <b>0.5</b> | <b>1</b> | <b>2</b> | <b>4</b> | <b>8</b> | <b>In total</b> |
|-----------------------|--------------|-------------|------------|----------|----------|----------|----------|-----------------|
| <i>A. alboluteus</i>  |              |             | 2          | 3        |          |          |          | 5               |
| <i>A. alboviridis</i> |              |             |            | 1        |          |          |          | 1               |
| <i>A. ardalensis</i>  |              |             |            |          |          |          | 2        | 2               |
| <i>A. flavipes</i>    |              |             | 1          | 1        |          |          |          | 2               |
| <i>A. iizukae</i>     |              |             |            | 1        | 2        | 3        | 4        | 10              |
| <i>A. inusitatus</i>  |              |             | 1          |          |          |          |          | 1               |
| <i>A. lanuginosus</i> |              | 1           |            |          |          |          |          | 1               |
| <i>A. lupppiae</i>    |              |             |            | 1        |          |          |          | 1               |

|                          |          |          |           |           |          |           |
|--------------------------|----------|----------|-----------|-----------|----------|-----------|
| <i>A. micronesiensis</i> | 1        | 10       | 4         | 1         |          | 16        |
| <i>A. movilensis</i>     |          | 3        | 1         |           |          | 4         |
| <i>A. neoflavipes</i>    | 1        |          |           |           |          | 1         |
| <i>A. olivimuriae</i>    | 1        |          |           |           |          | 1         |
| <i>A. polyporicola</i>   |          | 3        | 1         |           |          | 4         |
| <i>A. speleus</i>        |          | 3        | 6         |           |          | 9         |
| <i>A. suttoniae</i>      |          | 1        |           |           |          | 1         |
| <i>A. templicola</i>     | 1        | 5        |           |           |          | 6         |
| <i>A. urmiensis</i>      |          | 2        |           |           |          | 2         |
| <b>In total</b>          | <b>1</b> | <b>9</b> | <b>33</b> | <b>14</b> | <b>4</b> | <b>67</b> |

<sup>1</sup>MIC determinations performed with 25 °C incubation due to absence of growth at 37 °C (*A. polyporicola* and *A. speleus*)

| <b>Quality Control (QC)</b>     | <b>AMB</b> | <b>ITRA</b> | <b>POSA</b> | <b>VORI</b> | <b>ISAVU</b> | <b>TER</b> |
|---------------------------------|------------|-------------|-------------|-------------|--------------|------------|
| <i>A. fumigatus</i> ATCC 204305 | 0,5        | 0,25        | 0.125       | 1           | 1            | 4          |
| <i>A. fumigatus</i> ATCC 204305 | 0,5        | 0,25        | 0.125       | 1           | 1            | 2          |
| QC Target                       | 0.5        | 0.25        | 0.06-0.125  | 0.5         |              |            |
| QC Range                        | 0.25-1     | 0.125-0.5   | 0.03-0.25   | 0.25-1      |              |            |
